# Supplementary material for: Aggregation behavior of a gemini surfactant with a tripeptide spacer
Source: Royal Society of Chemistry journal article supplement (doi:10.1039/c4sm02668c), 2014-12-22
Supplement: c4sm02668c1.pdf [file c4sm02668c1.pdf]

**Supporting Information for Manuscript Entitled**  
**Aggregation Behavior of a Gemini Surfactant with a Tripeptide Spacer**

Meina Wang, Yuchun Han, Fulin Qiao and Yilin Wang\*

*Key Laboratory of Colloid and Interface Science, Beijing National Laboratory for Molecular  
Sciences (BNLMS), Institute of Chemistry, Chinese Academy of Sciences, Beijing 100190, People's  
Republic of China*

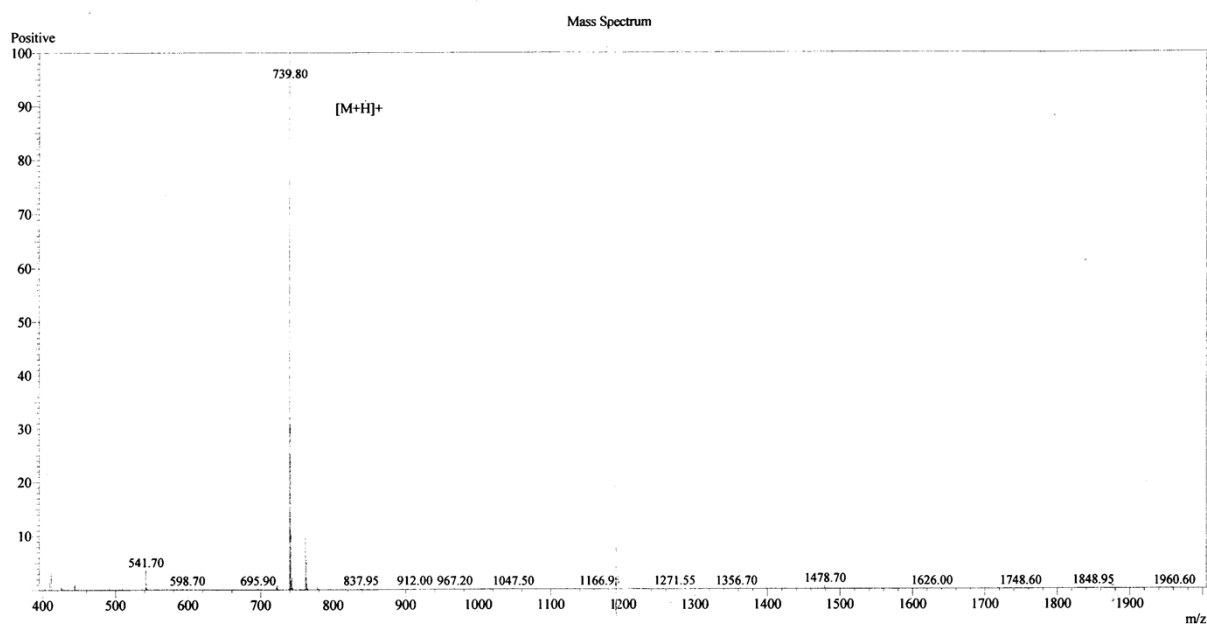

**Fig. S1** MS spectra of 12-G(NH<sub>2</sub>)LG(NH<sub>2</sub>)-12.

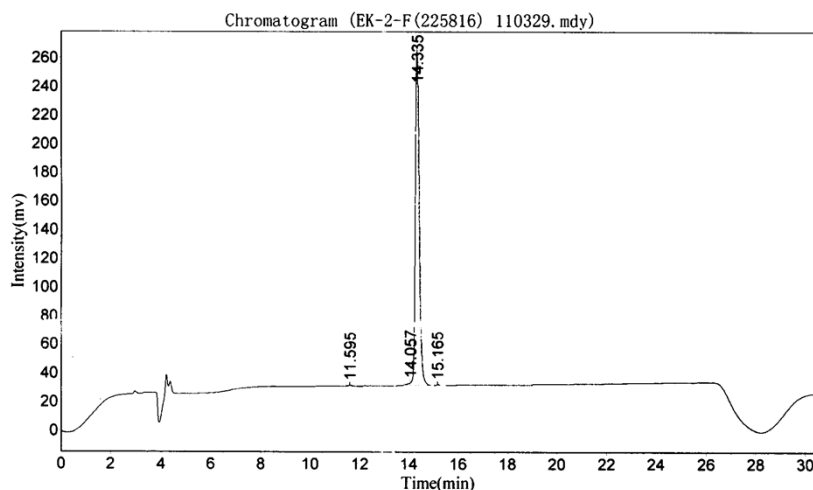

| Results  |         |          |            |             |          |
|----------|---------|----------|------------|-------------|----------|
| Peak No. | Peak ID | Ret Time | Height     | Area        | Conc.    |
| 1        |         | 11.595   | 512.001    | 6083.171    | 0.2352   |
| 2        |         | 14.057   | 1556.016   | 10066.487   | 0.3892   |
| 3        |         | 14.335   | 233104.625 | 2564878.000 | 99.1729  |
| 4        |         | 15.165   | 612.600    | 5241.632    | 0.2027   |
| Total    |         |          | 235785.242 | 2586269.291 | 100.0000 |

**Fig. S2** Analytical HPLC chromatograms of 12-G(NH<sub>2</sub>)LG(NH<sub>2</sub>)-12. The chromatograms were obtained by monitoring the absorbance at 220.0 nm using water/acetonitrile gradient containing 0.1 vol % trifluoroacetic as an eluent at a flow rate of 1.0 mL min<sup>-1</sup>.

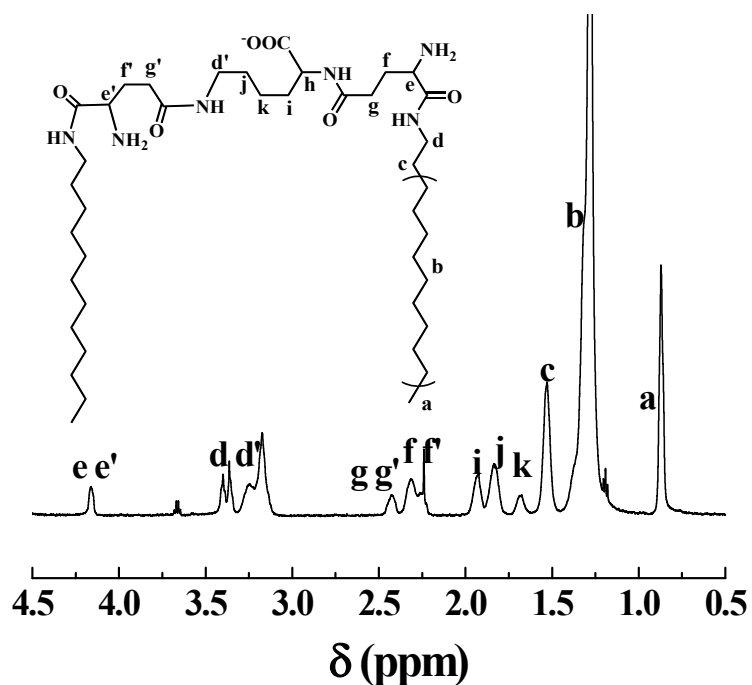

**Fig. S3** <sup>1</sup>H NMR spectra of 12-G(NH<sub>2</sub>)LG(NH<sub>2</sub>)-12 in water at pH 11.0.
